# Supplementary material for: Seipin forms a flexible cage at lipid droplet formation sites
Source: PubMed Central journal article supplement (PMC8930772; doi:10.1038/s41594-021-00718-y), 2022-02-24
Supplement: 41594_2021_718_MOESM1_ESM.pdf [file 41594_2021_718_MOESM1_ESM.pdf]

## Supplementary information

---

# Seipin forms a flexible cage at lipid droplet formation sites

---

In the format provided by the authors and unedited

## Supplementary Information

### Seipin forms a flexible cage at lipid droplet formation sites

Henning Arlt<sup>1,2,3</sup>, Xuewu Sui<sup>1,2</sup>, Brayden Folger<sup>4</sup>, Carson Adams<sup>5</sup>, Xiao Chen<sup>4</sup>, Roman Remme<sup>6</sup>, Fred A. Hamprecht<sup>6</sup>, Frank DiMaio<sup>5</sup>, Maofu Liao<sup>2</sup>, Joel M. Goodman<sup>4,\*</sup>, Robert V. Farese, Jr.<sup>1,2,7,\*</sup> & Tobias C. Walther<sup>1,2,3,7,\*</sup>

<sup>1</sup>Department of Molecular Metabolism, Harvard T. H. Chan School of Public Health, Boston, MA, 02115 USA

<sup>2</sup>Department of Cell Biology, Harvard Medical School, Boston, MA, 02115 USA

<sup>3</sup>Howard Hughes Medical Institute, Boston, MA, 02115 USA

<sup>4</sup>Department of Pharmacology, University of Texas Southwestern Medical School, Dallas, TX 75390-9041, USA

<sup>5</sup>Department of Biochemistry and Institute of Protein Design, University of Washington, Seattle, WA, 98195 USA

<sup>6</sup>Heidelberg Collaborative for Image Processing, Interdisciplinary Center for Scientific Computing, Heidelberg University, 69120 Heidelberg, Germany

<sup>7</sup>Broad Institute of Harvard and MIT, Cambridge, MA, 02124 USA

\* These authors contributed equally

Correspondence should be addressed to Joel M. Goodman (Joel.Goodman@UTSouthwestern.edu), Robert Farese, Jr. (robert@hsph.harvard.edu) and Tobias C. Walther (twalther@hsph.harvard.edu)

**Table S1. Plasmids used in this study**

| Name                      | Description                                                                      | Source     |
|---------------------------|----------------------------------------------------------------------------------|------------|
| pSK <sup>-</sup> -NAT-PGK |                                                                                  | this study |
| pBMF1                     | <i>SEI1pr-SEI1-13xmyc::HIS3</i>                                                  | this study |
| pHA144                    | pET28a <i>SEI1(47-235) R178A-6xHis</i>                                           | this study |
| pHA147                    | pET28a <i>SEI1(47-235)-6xHis</i>                                                 | this study |
| pHA234                    | pRS416 <i>ADHpr-GFP</i>                                                          | this study |
| pHA236                    | pRS416 <i>ADHpr-SEI1 (S33I Y37A Y41A)-GFP (Patch1)</i>                           | this study |
| pHA238                    | pRS416 <i>ADHpr-SEI1 (S33I Y37A Y41A M240G Y248I F255R I259K)-GFP (Patch1+2)</i> | this study |
| pHA240                    | pRS416 <i>ADHpr-SEI1(M240G Y248I F255R I259K)-EGFP (Patch2)</i>                  | this study |
| pHA246                    | pRS416 <i>ADHpr-SEI1-GFP</i>                                                     | this study |
| pHA247                    | pRS416 <i>ADHpr-SEI1 (R178A)-GFP</i>                                             | this study |
| pHA249                    | pRS416 <i>ADHpr-SEI1(Q114A)-EGFP</i>                                             | this study |
| pHA250                    | pRS416 <i>ADHpr-SEI1(E172A)-EGFP</i>                                             | this study |
| pHA251                    | pRS416 <i>ADHpr-SEI1(E172A R178A)-EGFP</i>                                       | this study |
| pHA252                    | pRS416 <i>ADHpr-SEI1(Q114A E172A R178A)-EGFP</i>                                 | this study |
| pHA253                    | pRS416 <i>ADHpr-SEI1(Q114A E172A)-EGFP</i>                                       | this study |
| pHA254                    | pRS416 <i>ADHpr-SEI1(Q114A R178A)-EGFP</i>                                       | this study |
| pHA279                    | pRS416 <i>ADH1pr-dm seipin-EGFP</i>                                              | this study |
| pHA406                    | pRS416 <i>ADHpr-SEI1 Δ169-173 -GFP</i>                                           | this study |
| pHA407                    | pRS416 <i>ADHpr-SEI (169,172,173 to A) -GFP</i>                                  | this study |
| pHA410                    | pRS416 <i>ADHpr-human seipin isoform 2 (1-300 aa) -GFP</i>                       | this study |
| pHA412                    | pRS416 <i>ADHpr-dm lumenal- yeast TM-GFP</i>                                     | this study |
| pHA413                    | pRS416 <i>ADHpr-human seipin-yeast TM-GFP</i>                                    | this study |
| pHA418                    | pRS416 <i>ADHpr-yeast lumenal-human TM-GFP</i>                                   | this study |
| pHA432                    | pRS416 <i>ADHpr-SEI1 (167-185 7xA)-GFP</i>                                       | this study |
| pHA433                    | pRS416 <i>ADHpr-SEI1 (Δ167-174)-GFP</i>                                          | this study |
| pHA444                    | pRS416 <i>ADHpr-yeast lumenal-dm TM-GFP</i>                                      | this study |
| pHA445                    | pRS416 <i>ADHpr-SEI1 (shuffled-switch)-GFP</i>                                   | this study |
| pHA446                    | pRS416 <i>ADHpr-SEI1 (Δ-switch)-GFP</i>                                          | this study |
| pHA523                    | pRS416 <i>ADHpr-SEI1 (C260L S266L T269I)-GFP</i>                                 | this study |
| pHA525                    | pRS416 <i>ADHpr-SEI1 shuffled TMD N-GFP</i>                                      | this study |
| pHA526                    | pRS416 <i>ADHpr-SEI1 shuffled TMD C-GFP</i>                                      | this study |
| pHA527                    | pRS416 <i>ADHpr-SEI1 shuffled TMD N+C-GFP</i>                                    | this study |
| pHA528                    | pRS416 <i>ADHpr-SEI1 TMD N FIT2-GFP</i>                                          | this study |
| pHA529                    | pRS416 <i>ADHpr-SEI1 TMD C FIT2-GFP</i>                                          | this study |
| pHA530                    | pRS416 <i>ADHpr-SEI1 TMD N+C FIT2-GFP</i>                                        | this study |
| pTW185                    | ssHDEL-MARS:: <i>LEU2</i>                                                        |            |

Italic font indicates gene or promoter information.

**Table S2. Yeast *S. cerevisiae* strains used in this study**

| Name                       | Genotype                                                                                    | Source     |
|----------------------------|---------------------------------------------------------------------------------------------|------------|
| BY4741                     | <i>MATa his3Δ1 leu2Δ0 met15Δ0 ura3Δ0</i>                                                    | Euroscarf  |
| HAY60                      | BY4741; <i>kanMX::GALpr-FLD1-3xFLAG-TEV-ProtA::hygR</i><br><i>natNT2::GAL1pr-LDB16</i>      | this study |
| TWY2143                    | BY4741; <i>sei1::kanMX</i>                                                                  | Euroscarf  |
| W303-1A                    | <i>MATa leu2-3,112 trp1-1 can1-100 ura3-1 ade2-1 his3-11,15</i>                             | 35         |
| W303-1A <i>sei1Δ</i>       | W303-1A; <i>sei1::hygR</i>                                                                  | 47         |
| W303-1A <i>sei1Δ pln1Δ</i> | W303-1A; <i>sei1::hygR pln1::HIS3MX6</i>                                                    | 47         |
| W303-1A <i>pln1Δ</i>       | W303-1A; <i>pln1::hygR</i>                                                                  | 47         |
| <i>SEI1-myc</i>            | W303-1A <i>pln1Δ</i> ; <i>SEI1::13xmyc-HIS3</i>                                             | this study |
| <i>ldb16Δ SEI1-myc</i>     | W303-1A <i>pln1Δ</i> ; <i>ldb16:kanMX:natNT1::PGK1pr- SEI1::13xmyc-HIS3</i>                 | this study |
| R178A                      | W303-1A <i>pln1Δ</i> ; <i>SEI1 (R178A)::13xmyc-HIS3</i>                                     | this study |
| Q114A                      | W303-1A <i>pln1Δ</i> ; <i>SEI1 (Q114A)::13xmyc-HIS3</i>                                     | this study |
| E172A                      | W303-1A <i>pln1Δ</i> ; <i>SEI1 (E172A)::13xmyc-HIS3</i>                                     | this study |
| Q114A R178A                | W303-1A <i>pln1Δ</i> ; <i>SEI1 (Q114A R178A)::13xmyc-HIS3</i>                               | this study |
| E172A R178A                | W303-1A <i>pln1Δ</i> ; <i>SEI1 (E172A R178A)::13xmyc-HIS3</i>                               | this study |
| Q114A E172A                | W303-1A <i>pln1Δ</i> ; <i>SEI1 (Q114A E172A)::13xmyc-HIS3</i>                               | this study |
| Q114A E172A R178A          | W303-1A <i>pln1Δ</i> ; <i>SEI1 (Q114A E172A R178A)::13xmyc-HIS3</i>                         | this study |
| PGK1pr-R178A               | W303-1A <i>pln1Δ</i> ; <i>natNT1::PGK1pr-SEI1 (R178A)::13xmyc-HIS3</i>                      | this study |
| R178A PGK1pr-LDB16         | W303-1A <i>pln1Δ</i> ; <i>natNT1::PGK1pr-SEI1 (R178A)::13xmyc-HIS3</i>                      | this study |
| Patch1                     | W303-1A <i>pln1Δ</i> ; <i>PGK1pr-SEI1 (Patch1)-13xmyc::HIS3</i>                             | this study |
| Patch1 R178A               | W303-1A <i>pln1Δ</i> ; <i>PGK1pr-SEI1 (Patch1 R178A)-13xmyc::HIS3</i>                       | this study |
| Patch2                     | W303-1A <i>pln1Δ</i> ; <i>hygR PGK1pr-SEI1 (Patch2)-13xmyc::HIS3</i>                        | this study |
| Patch2 R178A               | W303-1A <i>pln1Δ</i> ; <i>PGK1pr-SEI1 (Patch2 R178A)-13xmyc::HIS3</i>                       | this study |
| Patch1+2                   | W303-1A <i>pln1Δ</i> ; <i>PGK1pr-SEI1 (Patch1+2)-13xmyc::HIS3</i>                           | this study |
| Patch1+2 R178A             | W303-1A <i>pln1Δ</i> ; <i>PGK1pr-SEI1 (Patch1+2 R178A)-13xmyc::HIS3</i>                     | this study |
| Sei1 (TM-N-FIT2)           | W303-1A <i>pln1Δ</i> ; <i>PGK1pr-SEI1 (TMD-N)-13xmyc::HIS3</i>                              | this study |
| Sei1 (TM-C-FIT2)           | W303-1A <i>pln1Δ</i> ; <i>PGK1pr-SEI1 (TMD-C)-13xmyc::HIS3</i>                              | this study |
| Sei1 (TM-NC-FIT2)          | W303-1A <i>pln1Δ</i> ; <i>PGK1pr-SEI1 (TMD-N+C)-13xmyc::HIS3</i>                            | this study |
| Sei1 (shuffled TM-N)       | W303-1A <i>pln1Δ</i> ; <i>PGK1pr-SEI1 (shTMD-N)-13xmyc::HIS3</i>                            | this study |
| Sei1 (shuffled TM-C)       | W303-1A <i>pln1Δ</i> ; <i>PGK1pr-SEI1 (shTMD-C)-13xmyc::HIS3</i>                            | this study |
| Sei1 (shuffled TM-NC)      | W303-1A <i>pln1Δ</i> ; <i>PGK1pr-SEI1 (shTMD-N+C)-13xmyc::HIS3</i>                          | this study |
| C260L S266L T269I          | W303-1A <i>pln1Δ</i> ; <i>PGK1pr-SEI1 (C260L S266L T269I)-13xmyc::HIS3</i>                  | this study |
| Δ-switch                   | W303-1A <i>pln1Δ</i> ; <i>hygR natNT1::PGK1pr-SEI1 (Δ-switch)-</i>                          | this study |
| shuffled-switch            | W303-1A <i>pln1Δ</i> ; <i>natNT1::PGK1pr-SEI1 (shuffled-switch)-13xmyc</i><br><i>::HIS3</i> | this study |
| 169,172,173 to A           | W303-1A <i>pln1Δ</i> ; <i>natNT1::PGK1pr-SEI1 (3xA)::13xmyc-HIS3</i>                        | this study |
| 167-185 7xA                | W303-1A <i>pln1Δ</i> ; <i>natNT1::PGK1pr-SEI1 (7xA)::13xmyc-HIS3</i>                        | this study |
| Δ169-173                   | W303-1A <i>pln1Δ</i> ; <i>natNT1::PGK1pr-SEI1 (Δ169-173)::13xmyc-HIS3</i>                   | this study |
| Δ167-174                   | W303-1A <i>pln1Δ</i> ; <i>natNT1::PGK1pr-SEI1 (Δ167-174)::13xmyc-</i><br><i>HIS3</i>        | this study |

*Italic font indicates gene or promoter information.*
