# Supplementary material for: Seipin forms a flexible cage at lipid droplet formation sites
Source: PubMed Central journal article supplement (PMC8930772; doi:10.1038/s41594-021-00718-y), 2022-02-24

# Source Data Extended Figure 4a

## aMyc

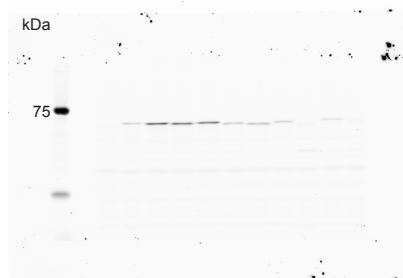

## aG6PDH

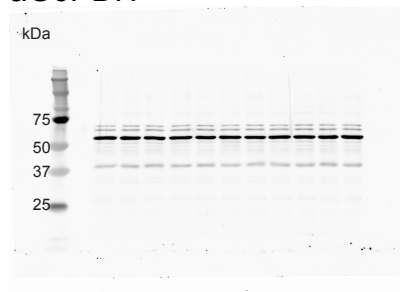

# Source Data Extended Figure 4e

high resolution

low resolution merge  
with marker

## aGFP

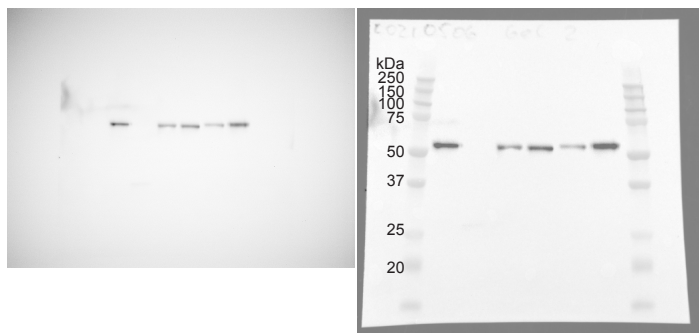

## aLdb16

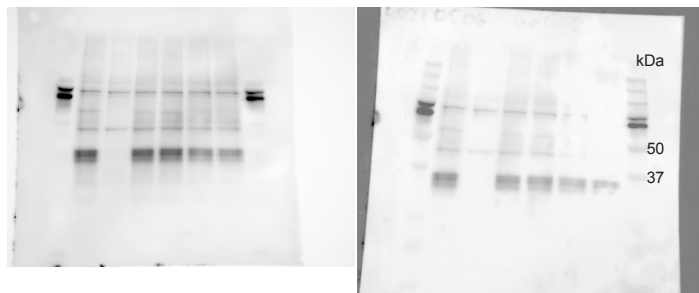

## aPgk1

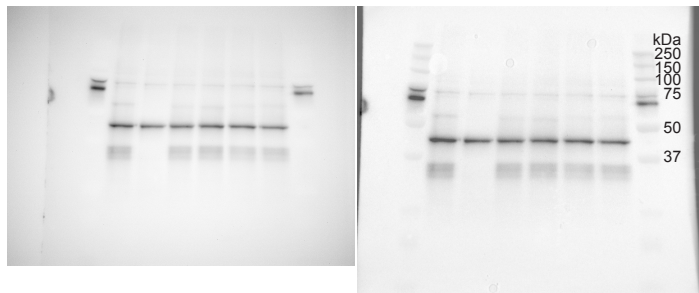

Supplement: 41594_2021_718_MOESM14_ESM.pdf [file 41594_2021_718_MOESM14_ESM.pdf]
