# Supplementary material for: Seipin forms a flexible cage at lipid droplet formation sites
Source: PubMed Central journal article supplement (PMC8930772; doi:10.1038/s41594-021-00718-y), 2022-02-24

### Source Data Extended Figure 5a

aMyc

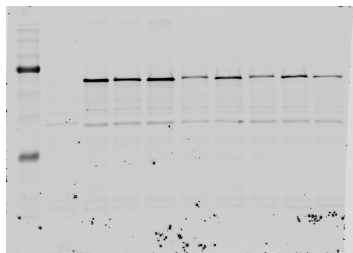

aG6PDH

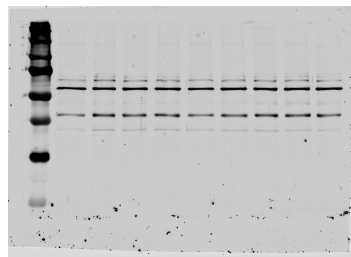

### Source Data Extended Figure 5b

high resolution

low resolution merge  
with marker

WT

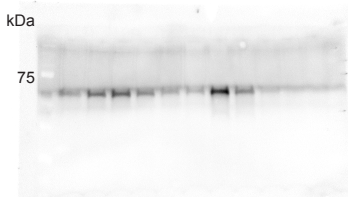

ldb16Δ

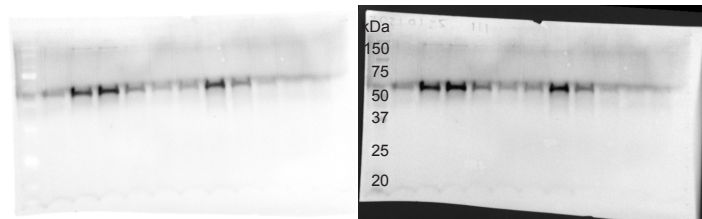

R178A PGK1pr-LDB16

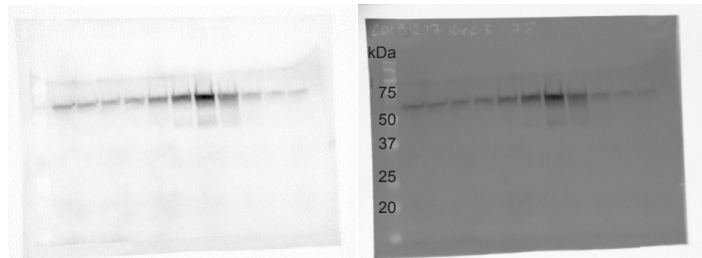

PGK1pr-R178

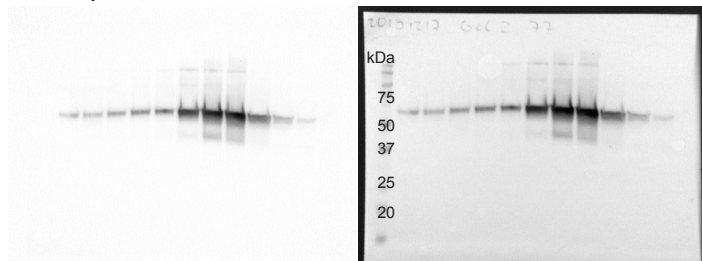

### Source Data Extended Figure 5h

WT  
(47-235)

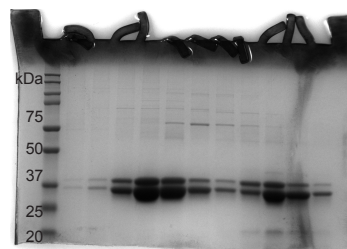

R178A  
(47-235)

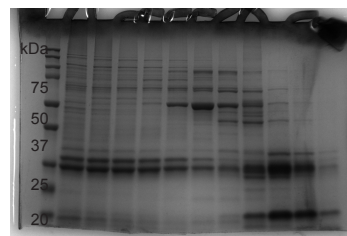

Supplement: 41594_2021_718_MOESM16_ESM.pdf [file 41594_2021_718_MOESM16_ESM.pdf]
