# Supplementary material for: Seipin forms a flexible cage at lipid droplet formation sites
Source: PubMed Central journal article supplement (PMC8930772; doi:10.1038/s41594-021-00718-y), 2022-02-24

Source Data Figure 6a

anti-G6PDH

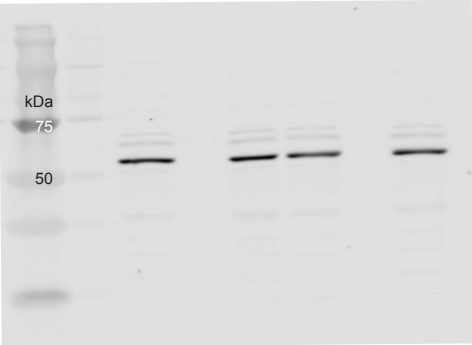

aMyc

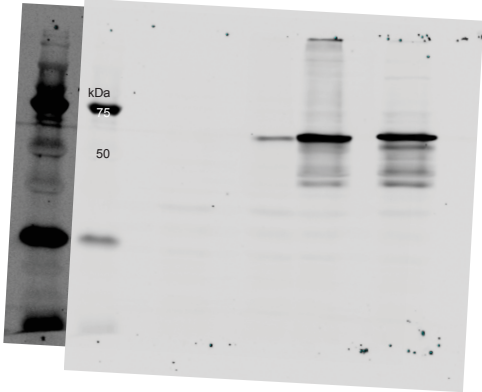

Source Data Figure 6b

high resolution

low resolution merge  
with marker

aFlag

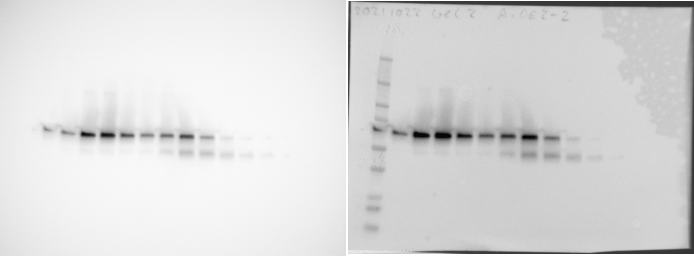

Supplement: 41594_2021_718_MOESM18_ESM.pdf [file 41594_2021_718_MOESM18_ESM.pdf]
