# Supplementary material for: Seipin forms a flexible cage at lipid droplet formation sites
Source: PubMed Central journal article supplement (PMC8930772; doi:10.1038/s41594-021-00718-y), 2022-02-24

Source Data Extended Figure 7a

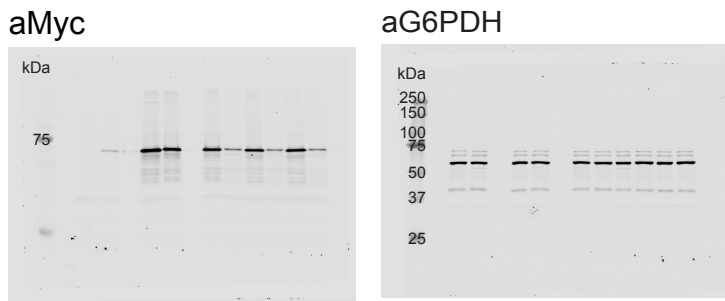

Source Data Extended Figure 7d

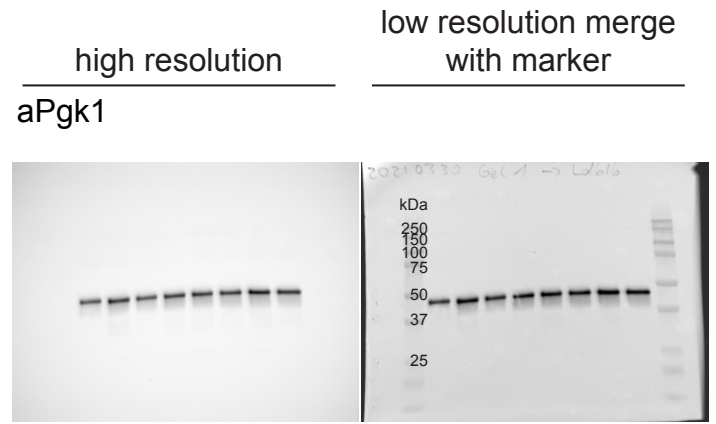

Source Data Extended Figure 7b

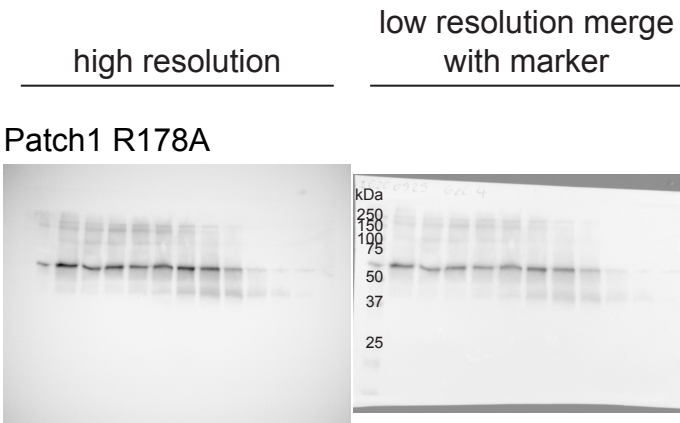

**aLdb16**

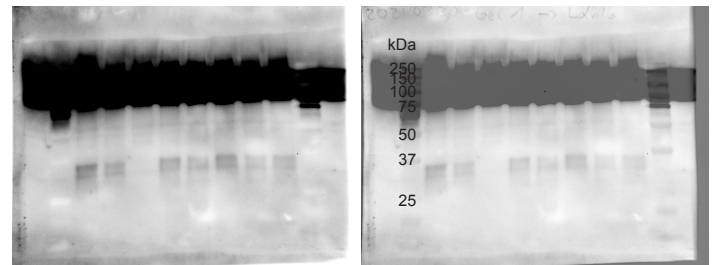

**Patch2 R178A**

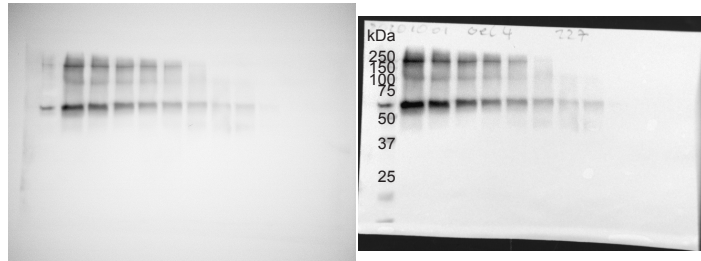

**aMyc**

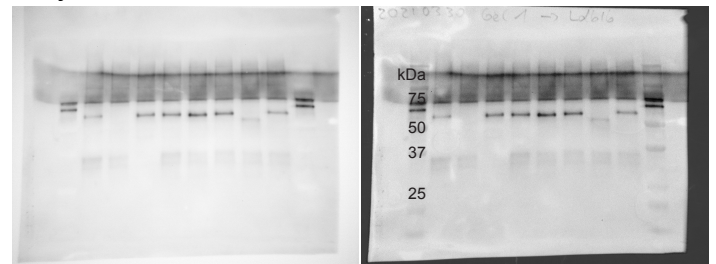

**Patch1+2 R178A**

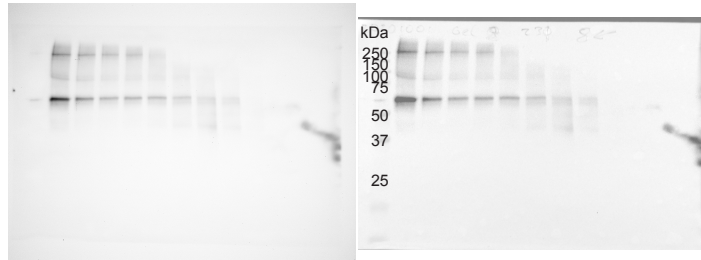

Source Data Extended Figure 7e

**Load-aMyc**

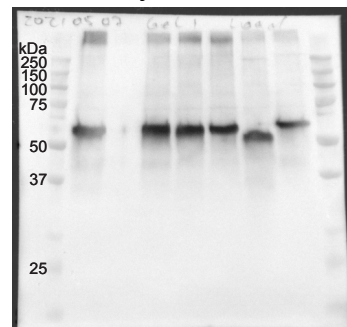

**Load-aLdb16**

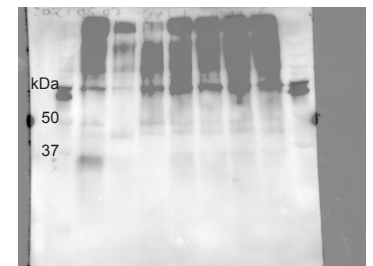

**IP-aMyc**

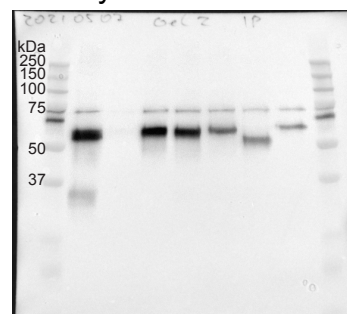

**IP-aLdb16**

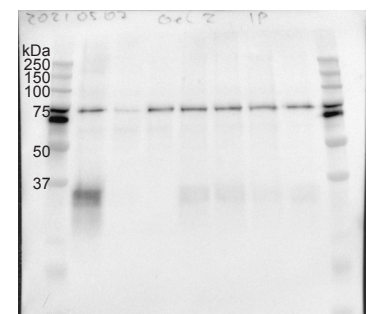

Supplement: 41594_2021_718_MOESM19_ESM.pdf [file 41594_2021_718_MOESM19_ESM.pdf]
