# Supplementary material for: Seipin forms a flexible cage at lipid droplet formation sites
Source: PubMed Central journal article supplement (PMC8930772; doi:10.1038/s41594-021-00718-y), 2022-02-24

Source Data Figure 9b

aMyc

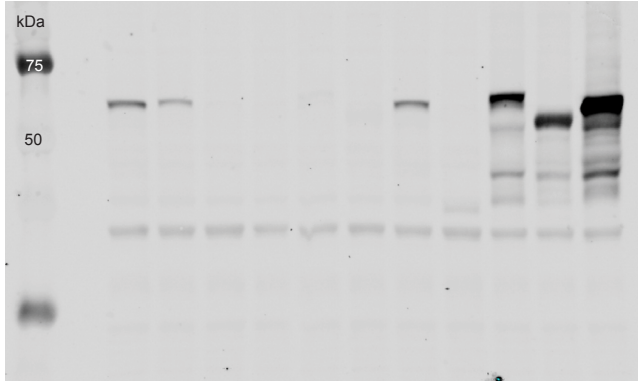

aG6PDH

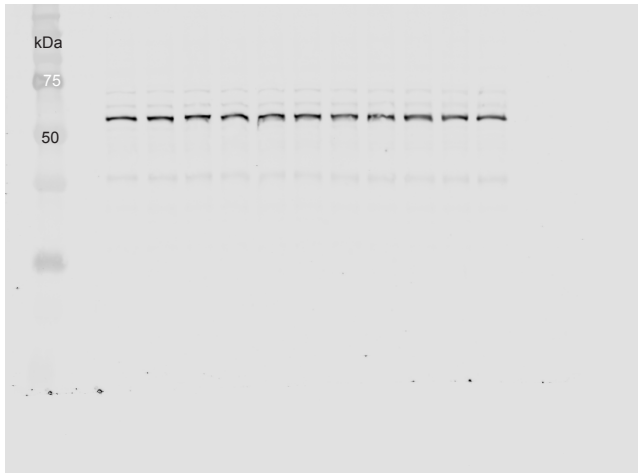

Supplement: 41594_2021_718_MOESM20_ESM.pdf [file 41594_2021_718_MOESM20_ESM.pdf]
